# Supplementary material for: Medical financial hardship between young adult cancer survivors and matched individuals without cancer in the United States
Source: PubMed Central journal article supplement (PMC10903972; doi:10.1093/jncics/pkae007), 2024-02-14
Supplement: pkae007_supplementary_data.pdf [file pkae007_supplementary_data.pdf]

Supplementary Material

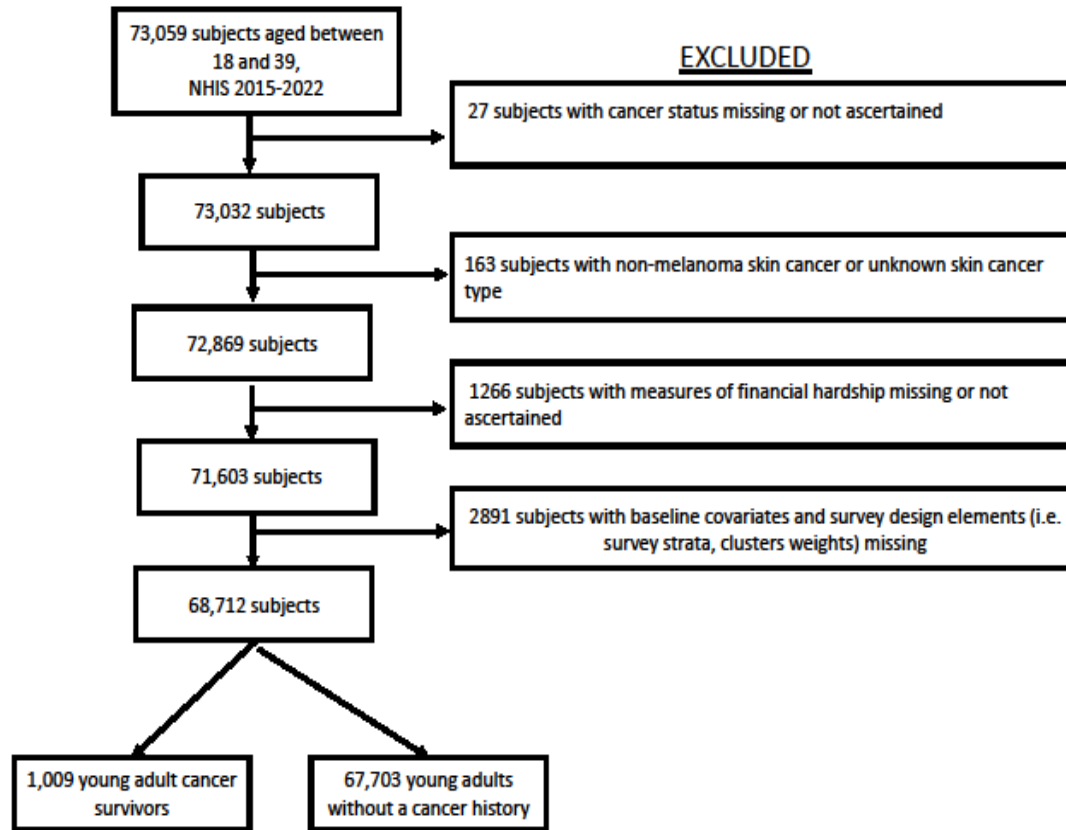

Supplementary Figure 1. Flow chart of the analytic cohort before matching
